# Supplementary material for: An osteogenic, antibacterial, and anti-inflammatory nanocomposite hydrogel platform to accelerate bone reconstruction
Source: Royal Society of Chemistry journal article supplement (doi:10.1039/d3tb00641g), 2023-01-01
Supplement: d3tb00641g1.pdf [file d3tb00641g1.pdf]

## **An osteogenic, antibacterial, and anti-inflammatory nanocomposite hydrogel platform to accelerate bone reconstruction**

Ismat Ullah<sup>1</sup>, Zahid Hussain<sup>1, 2</sup>, Salim Ullah<sup>1, 2</sup>, Qurat ul ain Zahra<sup>3</sup>, Yajie Zhang<sup>1</sup>, Shah Mehmood<sup>1, 2</sup>, Xingzhu Liu<sup>1</sup>, Muhammad Waseem Ghani<sup>1, 2</sup>, Mojtaba Mansoorianfar<sup>1</sup>, Edward Kamyra<sup>1, 2</sup>, Zhili Wang<sup>1</sup>, Zixun Wang<sup>1, 2</sup>, Renjun Pei<sup>1, 2\*</sup>

<sup>1</sup> CAS Key Laboratory of Nano-Bio Interface, Division of Nanobiomedicine, Suzhou Institute of Nano-Tech and Nano-Bionics (SINANO), Chinese Academy of Sciences, Suzhou, 215123, China.

<sup>2</sup> School of Nano-Tech and Nano-Bionics, University of Science and Technology of China (USTC), Hefei, 230026, China.

<sup>3</sup> Biomedical Imaging Center, University of Science and Technology of China (USTC), Hefei, 230026, China.

**\*Corresponding author**

Renjun Pei

\* E-mail: [rjpei2011@sinano.ac.cn](mailto:rjpei2011@sinano.ac.cn)

## Materials and methods

### Materials

Collagen was extracted from the tail of Sprague-Dawley rats (5-6 weeks old, Nanjing Sikerui Biological Technology Co. Ltd.). The inorganic salts including ferric chloride hexahydrate ( $\text{FeCl}_3 \cdot 6\text{H}_2\text{O}$ ), strontium nitrate [ $\text{Sr}(\text{NO}_3)_2$ ], and calcium nitrate tetrahydrate [ $\text{Ca}(\text{NO}_3)_2 \cdot 4\text{H}_2\text{O}$ ], were purchased from National Medicine Chemical Reagent Company China. Diammonium hydrogen phosphate [ $(\text{NH}_4)_2\text{HPO}_4$ ] was obtained from Regal Biotechnology, China. Ammonia solution ( $\text{NH}_4\text{OH}$ , 28-30%) was purchased from VWR Chemicals, and Irgacure 2959 was acquired from J&K Scientific Ltd., China. The methacrylic anhydride (MA) was received from Sigma-Aldrich. Hydrochloric acid, acetic acid, and nitric acid were bought from Shijiazhuang Asa Technology Co., Ltd., China. Ultrapure deionized distilled water ( $\text{ddH}_2\text{O}$ ) was used in all experiments. Alpha minimum essential medium ( $\alpha$ MEM), phosphate buffer saline (PBS), fetal bovine serum (FBS), antibiotics (penicillin/streptomycin), and supplementary cell culture reagents were purchased from Life Technologies and HyClone™.

### Synthesis of strontium/iron co-substituted hydroxyapatite nanomaterials

The strontium and/or iron substituted hydroxyapatite (Sr:HAp, Fe:HAp, and Sr/Fe:HAp) nanomaterials were synthesized following the early reported protocol <sup>1,2</sup> with some modifications via hydrothermal treatment, using calcium nitrate tetrahydrate, strontium nitrate, ferric chloride hexahydrate, diammonium hydrogen phosphate, and ammonia solution. Initially,  $\text{Ca}(\text{NO}_3)_2 \cdot 4\text{H}_2\text{O}$  salt was dissolved in deionized distilled water together with the desired concentrations of  $\text{Sr}(\text{NO}_3)_2 \cdot 4\text{H}_2\text{O}$  and/or  $\text{FeCl}_3 \cdot 6\text{H}_2\text{O}$ . 1.0 M cationic mixture was gently added to the 0.6 M of ammonium hydroxide ( $\text{HN}_4\text{OH}$ , pH ~9) solution. Thereafter, to enhance the bioactivity, improve organic-inorganic phase compatibility, and increase drug loading capacity, we added 0.05 wt% of collagen to the mixture, which was then stirred at room temperature for 24 hours. The final product was washed with deionized distilled water and freeze-dried for 72 h and kept the nanomaterials at  $-20\text{ }^\circ\text{C}$  till further use.

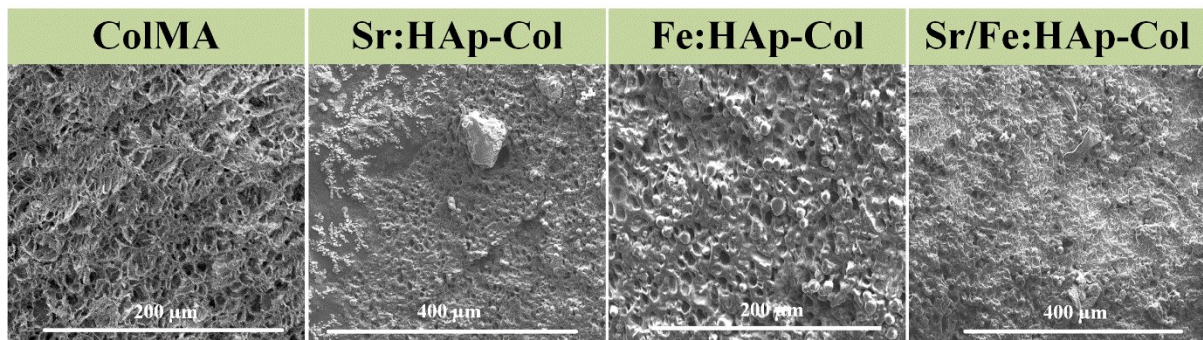

**Figure S1.** Cross-sectional SEM images of ColMA and nanocomposite hydrogels, showing the even distribution of nanocomposites within the hydrogel matrix. All the samples have rough and semi-porous network structures.

**Table S1.** Chemical reagents were used for the preparation of 1 X SBF/L, ion concentration of human blood plasma, and SBF.

| Chemical                                                      | Quantity | Ion concentration              | Blood plasma (mM) | SBF (mM) |
|---------------------------------------------------------------|----------|--------------------------------|-------------------|----------|
| NaCl                                                          | 6.5456 g | Na <sup>+</sup>                | 142               | 142      |
| NaHCO <sub>3</sub>                                            | 2.2682 g | K <sup>+</sup>                 | 5                 | 5        |
| KCl                                                           | 0.373 g  | Mg <sup>2+</sup>               | 1.5               | 1.5      |
| Na <sub>2</sub> HPO <sub>4</sub>                              | 0.1419 g | Ca <sup>2+</sup>               | 2.5               | 2.5      |
| MgCl <sub>2</sub> .6H <sub>2</sub> O                          | 0.3049 g | HPO <sub>4</sub> <sup>2-</sup> | 1                 | 1        |
| 1 M HCl                                                       | 9 mL     | HCO <sub>3</sub> <sup>-</sup>  | 27                | 4.2      |
| CaCl <sub>2</sub>                                             | 0.3675 g | Cl <sup>-</sup>                | 103               | 147.8    |
| Na <sub>2</sub> SO <sub>4</sub>                               | 0.071 g  | SO <sub>4</sub> <sup>2-</sup>  | 0.5               | 0.5      |
| Tris<br>{(CH <sub>2</sub> OH) <sub>3</sub> CNH <sub>2</sub> } | 6.057 g  | Buffering agent                | -                 | Tris     |

**Table S2.** The primer sequences data for qPCR analysis.

| <b>Target</b>  | <b>Primer sequence</b>          | <b>Length</b> | <b>Product size (bp)</b> |
|----------------|---------------------------------|---------------|--------------------------|
| <b>RUNX2</b>   | F-5'-CATCCATCCACTCCACCACG-3'    | 20nt          | 172                      |
| NM_001271631.1 | R-5'-AAAGGGCCCAGTTCTGAAGC-3'    | 20nt          |                          |
| <b>OPN</b>     | F-5'- TCTGATGAGACCGTCACTGC -3'  | 21nt          | 170                      |
| NM_001204203.1 | R-5'- AGGTCCTCATCTGTGGCATC -3'  | 21nt          |                          |
| <b>OCN</b>     | F-5'- GACCCTCTCTCTGCTCACTC-3'   | 20nt          | 123                      |
| NM_001032298.3 | R-5'- ACCTTATTGCCCTCCTGCTT-3'   | 20nt          |                          |
| <b>GAPDH</b>   | F-5'-GAAGGTGGTGAAGCAGGCATC-3'   | 21nt          | 109                      |
| NM_001289726.1 | R-5'-CGAAGGTGGAAGAGTGGGAGTTG-3' | 23nt          |                          |

**Table S3.** DLS average particle cluster size of as-synthesized nanomaterials and drug-laden nanomaterials.

| <b>Sample</b> | <b>Average Particle cluster size (nm)</b> | <b>Polydispersity index</b> |
|---------------|-------------------------------------------|-----------------------------|
| Sr:HAp        | 400 ± 25                                  | 0.234 ± 0.015               |
| Fe:HAp        | 540 ± 17                                  | 0.420 ± 0.01                |
| Sr/Fe:HAp     | 362 ± 26                                  | 0.289 ± 0.009               |
| D-Sr:HAp      | 315 ± 21                                  | 0.295 ± 0.01                |
| D-Fe:HAp      | 200 ± 25                                  | 0.149 ± 0.008               |
| D-Sr/Fe:HAp   | 297 ± 20                                  | 0.217 ± 0.011               |

**Table S4.** The rat blood serum ions data was measured via ICP-AES after treatment with Sr/Fe:HAp-Col at different times.

| Elements<br>(mg/dl) | Time        |              |             |
|---------------------|-------------|--------------|-------------|
|                     | 0 week      | 3 weeks      | 6 weeks     |
| Ca                  | 8.923±0.642 | 10.382±0.524 | 9.853±0.705 |
| P                   | 4.813±0.370 | 6.481±0.413  | 5.914±0.392 |
| Fe                  | 0.311±0.039 | 0.379±0.051  | 0.342±0.041 |
| Sr                  | ND*         | 0.117±0.038  | 0.085±0.021 |

ND\*: not detectable

## Reference

- 1 I. Ullah, W. Li, S. Lei, Y. Zhang, W. Zhang, U. Farooq, S. Ullah, M. W. Ullah and X. Zhang, *Ceram. Int.*, 2018, **44**, 21338–21348.
- 2 I. Ullah, Z. Hussain, Y. Zhang, X. Liu, S. Ullah, Y. Zhang, P. Zheng, T. Gao, Y. Liu, Z. Zhang, Y. Cao, Z. Wang, M. Mansoorianfar, M. Xu and R. Pei, *Appl. Mater. Today*, 2022, **28**, 101532.
